# Psychiatric Services

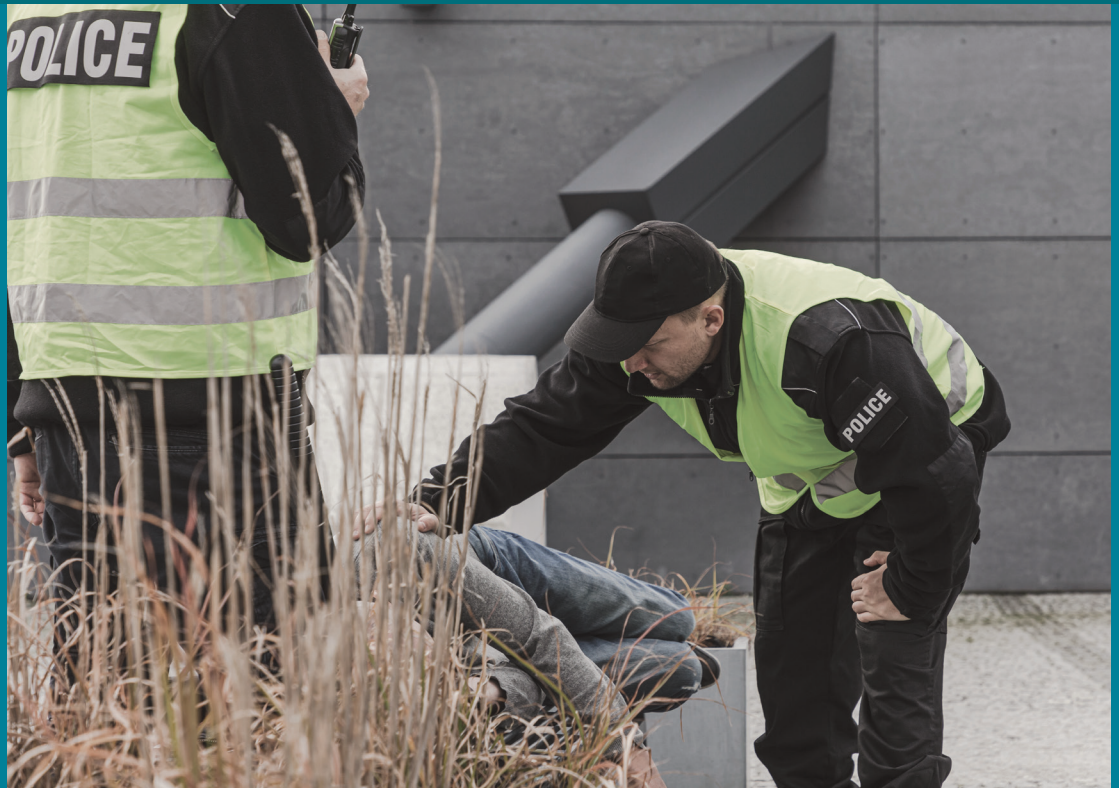

Racism and mental health equity: history repeating itself

Police reform and mental health

Hospital financial incentives to create post-ED opioid treatment pathways

Viewpoint: From shelters to hotels: finding enduring solutions to homelessness
