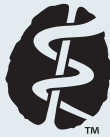

# Psychiatric Services

A Journal of the American Psychiatric Association

*Psychiatric Services*, established in 1950, is published monthly by the American Psychiatric Association for mental health professionals and others concerned with treatment and services for persons with mental illnesses and mental disabilities, in keeping with APA's objectives to improve care and treatment, to promote research and professional education in psychiatric and related fields, and to advance the standards of all psychiatric services and facilities.

## Mailing Address

*Psychiatric Services*  
American Psychiatric Association  
800 Maine Ave., S.W., Suite 900  
Washington, DC 20024  
Email: [psjournal@psych.org](mailto:psjournal@psych.org)

## Editorial Staff

Demarie S. Jackson

### Managing Editor

Martin J. Spiering, Ph.D., E.L.S.

### Senior Editor and Writer

Brendan Missett

### Staff Editor

Wendy Lieberman Taylor

### Production Manager

Heidi A. Koch-Bubel

### Editorial Support Services Manager

## Publisher

John McDuffie

## Editorial Director, Journals

Michael D. Roy

## American Psychiatric Association

Vlavian B. Pender, M.D.

### President

Rebecca W. Brendel, M.D., J.D.

### President-Elect

Saul Levin, M.D., M.P.A.

### Chief Executive Officer and Medical Director

## Editor

Lisa B. Dixon, M.D., M.P.H.

## Editorial Board

Deidre M. Anglin, Ph.D.

Chyrell Bellamy, Ph.D., M.S.W.

Regina Bussing, M.D., M.S.H.S.

Sidney H. Hankerson, M.D., M.B.A.

Robert J. Hilt, M.D.

Marcela Horvitz-Lennon, M.D., M.P.H.

Nev Jones, Ph.D.

Michael A. Lindsey, Ph.D., M.S.W.

Hunter L. McQuiston, M.D.

Jeanne Miranda, Ph.D.

Ramin Mojtabai, M.D., Ph.D.

Mark R. Munetz, M.D.

Mark Olfson, M.D., M.P.H.

David W. Oslin, M.D.

Delbert Robinson, M.D.

Rebecca C. Rossom, M.D., M.S.

Jason Schiffman, Ph.D.

Ruth S. Shim, M.D., M.P.H.

Philip Wang, M.D., Dr.P.H.

Lawrence Wissow, M.D., M.P.H.

## Contributing Editors

### Case Studies in Public-Sector

#### Leadership

Jules M. Ranz, M.D., and Stephanie  
Le Melle, M.D.

### Controversies in Psychiatric Services

Matthew D. Erlich, M.D., Patrick  
Runnels, M.D., M.B.A., and Rachel Talley,  
M.D.

### Culture & Mental Health Services

Roberto Lewis-Fernández, M.D.

### Datapoints

Tami L. Mark, Ph.D., and Alexander J.  
Cowell, Ph.D.

### Economic Grand Rounds

Steven S. Sharfstein, M.D., Haiden A.  
Huskamp, Ph.D., and Alison Evans  
Cuellar, Ph.D.

### Editor's Choice

Carrie Cunningham, M.D., M.P.H., and  
Matthew L. Goldman, M.D., M.S.

### From Pages to Practice podcast

Josh Berezin, M.D., M.S.

### Frontline Reports

Francine Cournos, M.D., and Stephen  
M. Goldfinger, M.D.

### Global Mental Health Reforms

Kathleen M. Pike, M.D., Matias  
Irrarázaval, M.D., M.P.H., and Lola  
Kola, Ph.D.

### Integrated Care

Benjamin G. Druss, M.D., M.P.H., and  
Gail L. Daumit, M.D., M.H.S.

### Law & Psychiatry

Paul S. Appelbaum, M.D.

### Lived Experience Inclusion & Leadership

Nev Jones, Ph.D., and Keris Jän  
Myrick, M.B.A., M.S.

### Personal Accounts

Patricia E. Deegan, Ph.D., and William  
C. Torrey, M.D.

### Promoting High-Value Mental Health Care

Marcela Horvitz-Lennon, M.D., M.P.H.,  
and Kenneth Minkoff, M.D. and  
Esperanza Diaz, M.D.

### Racism & Mental Health Equity

Ruth Shim, M.D., M.P.H., Michael  
Mensah, M.D., M.P.H., and Lucy  
Ogbu-Nwobodo, M.D., M.S.

### Research, Community, & Services Partnerships

Debra A. Pinals, M.D., Enrico G.  
Castillo, M.D., M.S.H.P.M., and Ayorkor  
Gaba, Psy.D.

### Social Determinants of Mental Health

Ruth S. Shim, M.D., M.P.H., and  
Michael T. Compton, M.D., M.P.H.

### State Mental Health Policy

Marvin S. Swartz, M.D., and Steven  
Starks, M.D.

### Technology in Mental Health

Dror Ben-Zeev, Ph.D.

## Editors Emeriti

Howard H. Goldman, M.D., Ph.D.

John A. Talbott, M.D.

## Statistical Consultant

Melanie M. Wall, Ph.D.

## Editorial Consultants

Dixon Chibanda, M.D., M.P.H.

Shirley M. Glynn, Ph.D.

Judith Weissman, Ph.D., J.D.
